1 Overabundance of *Asaia* and *Serratia* bacteria is associated with deltamethrin insecticide  
2 susceptibility in *Anopheles coluzzii* from Agboville, Côte d'Ivoire

3

4 Bethanie Pelloquin<sup>1,2</sup>, Mojca Kristan<sup>1</sup>, Constant Edi<sup>3</sup>, Anne Meiwald<sup>1</sup>, Emma Clark<sup>1</sup>, Claire  
5 L. Jeffries<sup>1</sup>, Thomas Walker<sup>1</sup>, Nsa Dada<sup>4,5,6\*</sup>, Louisa A. Messenger<sup>1\*+</sup>

6

7 \* these authors contributed equally to this work

8

9 + Corresponding author; [louisa.messenger@lshtm.ac.uk](mailto:louisa.messenger@lshtm.ac.uk)

10

11 Affiliations:

12 <sup>1</sup> Department of Disease Control, Faculty of Infectious and Tropical Diseases, London School  
13 of Hygiene and Tropical Medicine, London, United Kingdom, WC1E 7HT

14 <sup>2</sup> School of Tropical Medicine and Global Health, University of Nagasaki, Nagasaki, Japan,

15 <sup>3</sup> Centre Suisse de Recherche Scientifique en Côte d'Ivoire, Abidjan 01, BP 1303, Abidjan,  
16 Côte d'Ivoire

17 <sup>4</sup> Faculty of Science and Technology, Norwegian University of Life Sciences, Aas, Norway

18 <sup>5</sup> Public Health and Epidemiology Department, Nigerian Institute of Medical Research,  
19 Lagos, Nigeria

20 <sup>6</sup> Tropical Infectious Disease Research Center, University of Abomey-Calavi, Cotonou,  
21 Benin

22

## 23 Abstract

### 24 Background

25 Insecticide resistance among mosquito species is now a pervasive phenomenon, which  
26 threatens to jeopardise global malaria vector control efforts. Evidence of links between the  
27 mosquito microbiota and insecticide resistance is emerging, with significant enrichment of  
28 insecticide degrading bacteria and enzymes in resistant populations. Using 16S rRNA  
29 amplicon sequencing, we characterised and compared the microbiota of *Anopheles (An.)*  
30 *coluzzii* in relation to their deltamethrin resistance and exposure profiles.

### 31 Results

32 Comparisons between 2-3 day old deltamethrin resistant and susceptible mosquitoes,  
33 demonstrated significant differences in microbiota diversity (PERMANOVA, pseudo-F =  
34 19.44, p=0.0015). *Ochrobactrum*, *Lysinibacillus* and *Stenotrophomonas* genera, each of  
35 which comprised insecticide degrading species, were significantly enriched in resistant  
36 mosquitoes. Susceptible mosquitoes had a significant reduction in alpha diversity compared  
37 to resistant individuals (Shannon index: H=13.91, q=0.0003, Faith's phylogenetic diversity:  
38 H=6.68, q=0.01), with *Asaia* and *Serratia* dominating microbial profiles. There was no  
39 significant difference in deltamethrin exposed and unexposed 5-6 day old individuals,  
40 suggesting that insecticide exposure had minimal impact on microbial composition. *Serratia*  
41 and *Asaia* were also dominant in 5-6 day old mosquitoes, regardless of exposure or  
42 phenotype, and had reduced microbial diversity compared with 2-3 day old mosquitoes.

### 43 Conclusions

44 Our findings revealed significant alterations of *An. coluzzii* microbiota associated with  
45 deltamethrin resistance, highlighting the potential for identification of novel microbial  
46 markers for insecticide resistance surveillance. qPCR detection of *Serratia* and *Asaia* was  
47 consistent with 16S rRNA sequencing, suggesting that population level field screening of the

48 bacterial microbiota may be feasibly integrated into wider resistance monitoring if reliable  
49 and reproducible markers associated with phenotype can be identified.

50

51

52 **Keywords:** *Anopheles coluzzii*, insecticide resistance, microbiota, deltamethrin, malaria,  
53 Côte d'Ivoire, *Asaia*, *Serratia*

54

## 55 **Background**

56 Malaria remains a considerable public health problem with an estimated 229 million cases  
57 worldwide, including 409,000 deaths in 2019 alone[1]. Malaria mortality has fallen since  
58 2010, largely due to the scale-up of treatment, diagnostics and insecticide-based vector  
59 control interventions, principally long-lasting insecticidal nets (LLINs) and indoor residual  
60 spraying (IRS). However, global gains in malaria control have begun to stall[2]. Insecticide  
61 resistance among major malaria vector species is now a pervasive phenomenon, affecting  
62 more than 90% of countries with ongoing transmission[2]. Of particular concern is the  
63 continued spread of resistance to pyrethroids, which were until recently, the only class of  
64 insecticide recommended for use in LLINs. Pyrethroids are still a crucial component of next-  
65 generation LLINs[3], and resistance may severely threaten the long-term effectiveness of  
66 contemporary vector control programmes.

67

68 Control of insecticide-resistant vector populations is predicated on a clear understanding of  
69 the complex interplay between molecular mechanisms and fitness costs which contribute to  
70 mosquito behaviour, phenotype and vectorial capacity, the genetic and local environmental  
71 factors driving ongoing resistance selection and the implications of resistance for intervention  
72 operational efficacy. Substantial progress has been made elucidating key target site  
73 mutations[4]–[7], over-expression of detoxification enzymes[8]–[12] and alternate gene  
74 families and pathways[13]–[17], all of which play important roles in resistance modulation.  
75 Furthermore, the recent publication of genome data for more than 1000 *Anopheles* (*An.*)  
76 *gambiae* sensu lato (s.l.) has illustrated the considerable genetic diversity among natural  
77 vector populations, raising concerns for the rapid evolution and spread of novel resistance  
78 mechanisms[18], [19].

79

80 In addition to host-mediated resistance mechanisms, evidence is emerging that changes in  
81 mosquito microbiota may confer resistance to certain insecticides. The mosquito microbiota  
82 is a heterogenous and variable network of microorganisms, comprising the bacterial,  
83 archaeal, viral, fungal, and other eukaryotic microbial communities which inhabit the  
84 mosquito cuticle and internal structures such as the midgut, salivary glands, and ovaries.  
85 Constituents of the microbiota can be either inherited from mother to offspring[20] or  
86 acquired from the environment, predominantly the larval habitat[21]. Characterisation of the  
87 microbiota in mosquitoes has shown varied phenotypic impacts on the host species including  
88 on fitness[22], blood feeding[23], fecundity[24], immunity[25], [26], pathogen infection[27]–  
89 [33] and transmission[34]. There is increasing interest in investigating symbionts of mosquito  
90 vectors because they may offer unique transmission-blocking opportunities. Similarly, studies  
91 on the role played by mosquito symbionts in insecticide resistance may offer a better  
92 understanding of the underlying mechanisms, and the potential for designing innovative  
93 control techniques[35] and developing new insecticide resistance monitoring tools.

94 The interaction between insecticide resistance and arthropod microbiota has been examined  
95 principally in agricultural pest species. Chlorpyrifos and fipronil resistant strains of the  
96 Diamondback moth, *Plutella xylostella* were shown to have a higher proportion of  
97 *Lactobacillales*, *Pseudomonadales* and *Xanthomonadales* bacteria[36]. Furthermore, the bean  
98 bug *R. pedertris* and allied stinkbug species harbour symbiotic *Burkholderia* bacteria which  
99 degrade fenitrothion, and are present in greater abundance when this insecticide is applied to  
100 their habitat.[37] As advanced molecular technologies become increasingly accessible,  
101 research in this area is expanding to disease vectors, with recent studies on several mosquito  
102 species. Whole metagenome sequencing of microbiota from wild-caught fenitrothion resistant  
103 and susceptible *An. albimanus* mosquitoes showed distinct differences between these two  
104 groups<sup>65</sup>. Fenitrothion-resistant mosquitoes had significant enrichment of organophosphate  
105 degrading bacteria and enzymes such as hydrolases, carboxylesterases and  
106 phosphomonoesterases. Resistant mosquitoes also had lower bacterial diversity, with an  
107 overabundance of *Klebsiella spp.* and a reduction in the relative abundance of *Enterobacter*  
108 *spp.* It was suggested that selection for organophosphate degrading bacteria may have  
109 developed alongside resistance, potentially in response to prior insecticide exposure[38]. F<sub>1</sub>  
110 progeny of field-caught *An. albimanus* exposed to the pyrethroids alpha-cypermethrin and  
111 permethrin had significantly greater abundance of bacteria from the genus *Pseudomonas*, of  
112 which several strains have been shown to metabolise pyrethroids, and from the genus  
113 *Pantoea*[39], which had previously been identified in insecticide-resistant mosquitoes[38].  
114 *Pseudomonas*, alongside *Clostridium* and *Rhizobium* species, were also implicated in lambda-  
115 cyhalothrin resistance in wild populations of *Aedes (Ae.) aegypti* from Colombia[40].  
116 Addition of tetracycline to temephos-resistant strains of *An. stephensi* destroyed the bacterial  
117 component of the microbiota and significantly reduced the activity of three main resistance  
118 enzymes:  $\alpha$  esterase, glutathione-S-transferase, and acetylcholinesterase, restoring mosquito  
119 susceptibility[41]. Similarly, sterilisation of *An. arabiensis* gut microbiota by antibiotics  
120 resulted in a decreased tolerance to deltamethrin and malathion[42].

121 To date, information on field populations of the *An. gambiae* complex, the main malaria  
122 vectors in sub-Saharan Africa, is limited to recent reports of significant enrichment of known  
123 pyrethroid degrading taxa (*Sphingobacterium*, *Lysinibacillus* and *Streptococcus*) in  
124 permethrin-resistant *An. gambiae sensu stricto* (s.s.) from Kenya[43]. To address this deficit,  
125 we comparatively characterised the bacterial microbiota of *An. coluzzii*, collected from an  
126 area of high pyrethroid resistance in Côte d'Ivoire. We specifically focused on determining  
127 the effects of deltamethrin resistance intensity on host microbiota and identifying any  
128 microbial taxa associated with resistance phenotypes.

129

## 130 **Methods**

### 131 *Mosquito collections and mass rearing*

132 This study was conducted in Agboville (GPS: 5°55'21" N 4°13'13" W), Agnéby-Tiassa  
133 region, south-east Côte d'Ivoire. The location was chosen because of its high mosquito  
134 densities, malaria prevalence (26% in children <5 years in recent estimates[44]) and intense  
135 deltamethrin resistance[45]. The main industry is agriculture, with livestock such as cows,

136 goats and chickens living close to households and cultivation of crops including bananas,  
137 cocoa and rice[46].

138 Sampling was conducted between 5th July and 26th July 2019, coinciding with the long rainy  
139 season (May-November) and peak malaria transmission. Adult mosquitoes were collected  
140 using HLCs, inside and outside households from 18:00h to 06:00h. Fieldworkers used  
141 individual haemolysis tubes to collect host-seeking mosquitoes, which were transported each  
142 morning to the Centre Suisse de Recherche Scientifique en Côte d'Ivoire (CSRS) in Abidjan.  
143 Blood-fed mosquitoes, morphologically identified as female *An. gambiae* s.l.[47], were  
144 transferred to cages with 10% sugar solution and left for 2-3 days to become fully gravid.

145 Five hundred and eighty fully gravid females were used for forced oviposition. Oviposition  
146 was achieved by placing a single gravid mosquito into an 1.5 ml Eppendorf tube, half filled  
147 with damp cotton wool, with small holes in the tube cap for ventilation[48]. Mosquitoes were  
148 held under standard insectary conditions (25°C, 70% humidity and a 12-hour light-dark  
149 cycle) until eggs were laid or adult death. Eggs were removed daily and placed into sterile  
150 paper cups containing distilled water and NISHIKOI (Nishikoi, United Kingdom)[49] staple  
151 fish food pellets. Emergent larvae were reared in 50 cm washing up bowls, in distilled water  
152 under the same insectary conditions. Pupae were removed daily and separated by sex with the  
153 aid of a stereomicroscope. Female pupae were put in a clean plastic cup with distilled water  
154 and placed in a cage for eclosion, while male pupae were discarded. Adults were housed in  
155 cages in an incubator (26.6°C, 70% humidity) with a 12-hour light-dark cycle and given  
156 unlimited access to 10% glucose solution. The cages were checked to ensure that only virgin  
157 females were used in bioassays, as mating can potentially introduce changes to the  
158 microbiome[20]. Care was also taken to ensure that no mosquito obtained a blood meal  
159 during handling, as this can significantly decrease bacterial diversity in the gut[50].

160 *Determining deltamethrin resistance status of adult F1 progeny of field-caught An. gambiae*  
161 *s.l.*

162 Deltamethrin resistance was characterised using Centre for Disease Control (CDC) bottle  
163 bioassays[51], with some modifications. Two to three-day old (d) virgin F<sub>1</sub> females were  
164 exposed to 1, 5 or 10 times the diagnostic dose of deltamethrin (12.5µg/bottle) for 30  
165 minutes. Stock solutions of deltamethrin were prepared using 100% ethanol as the solvent.  
166 Per bioassay, multiple 250mL Wheaton bottles, and their lids, were coated with 1mL stock  
167 solution and left to dry in a dark storage area to avoid exposure to UV light. A control bottle,  
168 treated with 1mL ethanol, was assayed in parallel. Prior to bioassay testing, approximately  
169 20-25 mosquitoes were aspirated into holding cups. After 1-2 hours of acclimatisation, they  
170 were introduced into each test or control bottle.

171 Knock-down was scored at 0, 15 and 30 minutes. A subset of mosquitoes which were alive at  
172 60 minutes were held for 72 hours, with mortality recorded every 24 hours. These were  
173 housed in paper cups in the insectary, with unlimited access to sterile 10% glucose made with  
174 distilled water. Mosquitoes were counted as dead if they were unable to stand as per WHO  
175 criteria[51].

176 At the end of the bioassay and subsequent holding time, mosquitoes were classified as:  
177 susceptible if they were knocked-down following exposure to 1x deltamethrin, resistant if  
178 they survived 60 minutes or 72 hours post-exposure to 1x, 5x or 10x deltamethrin, or controls

179 if they were in the ethanol coated bottle. Specimens were separated into their respective  
180 phenotype and concentration/time group and stored at -70°C.

#### 181 *DNA extraction*

182

183 DNA was extracted from 380 mosquitoes which had been categorised as resistant, susceptible  
184 or unexposed to deltamethrin. Individuals were homogenised in a QIAGEN® TissueLyser II  
185 with sterilised 5mm stainless steel beads for 5 minutes at 30hz/sec and incubated overnight at  
186 56°C. DNA was extracted using a QIAGEN DNeasy® 96 Blood and Tissue Kit (Qiagen®,  
187 UK) as per the manufacturers protocol[52] with DNA eluted in 45µL of buffer AE. Extracted  
188 DNA was stored at -70°C.

189 Four blank extraction controls were processed alongside mosquitoes: three blanks containing  
190 RNase-free water as the extraction template and one blank containing the 70% ethanol used  
191 for reagent dilution and sterilisation of instruments. All steps were performed under sterile  
192 conditions, with tweezers and other instruments being rinsed with 70% ethanol in between  
193 handling each mosquito, to avoid microbial or DNA contamination.

#### 194 *PCR for mosquito species identification*

195 Individual mosquitoes were identified to species level according to Santolamazza et al[53].  
196 PCR reactions contained 2µL of 10µM forward primer (5'-TCGCCTTAGACCTTGCCTTA-  
197 3'), 2 µL of 10µM reverse primer (5'-CGCTTCAAGAATTCGAGATAC-3'), 1µL extracted  
198 DNA and 10µL HotStart Taq Master Mix (New England Biolabs, UK), for a final reaction  
199 volume of 20µL. Prepared reactions were run on a BioRad T100™ thermal cycler with the  
200 following conditions: 10 minutes denaturation time at 94°C, followed by 35 amplification  
201 cycles of 94°C for 30 seconds, 54°C for 30 seconds and 72°C for 60 seconds, followed by a  
202 final extension at 72°C for 10 minutes. PCR products were visualised on 2% E-gel agarose  
203 gels in an Invitrogen E-gel iBase Real-Time Transilluminator. A Quick-Load® 100bp DNA  
204 ladder (New England Biolabs, UK) was used to determine band size. Amplified PCR  
205 products of 479 bp or 249 bp were indicative of *An. coluzzii* or *An. gambiae* s.s., respectively.  
206 As the dominant species, only *An. coluzzii* individuals of the same age and resistance  
207 phenotype were selected and pooled for 16S rRNA sequencing.

208

#### 209 *16S rRNA gene amplicon sequencing*

210 DNA concentration from each mosquito was measured using an Invitrogen Qubit™ 4  
211 Fluorometer (Thermo Fisher Scientific, USA). Pools were prepared by combining equal  
212 concentrations of DNA from 3 mosquitoes of the same phenotype/deltamethrin  
213 concentration/time group to give 100ng in a final volume of 20µL (Table S1). Two negative  
214 controls, one comprised of a pool of the three RNase-free water blanks mentioned above, and  
215 the 70% ethanol blank, were processed in parallel.

216 The microbial composition of the microbiome was determined by amplification of the V3-V4  
217 region of the *16S rRNA* gene, using the following primers: 5'-CCTACGGGNGGCWGCAG-  
218 3' and 5'-GGACTACHVGGGTATCTAATCC-3'. PCR reactions were prepared in a 25µL  
219 reaction volume, comprising 12.5µL of KAPA® HiFi Hot Start ReadyMixPCR Kit[54]  
220 (Roche, Switzerland), 0.5µL of forward and reverse primers (10µM) and 12.5ng DNA. The  
221 following PCR cycling was used: 95°C for 3 minutes, 35 cycles of 95°C for 30 seconds, 55°C  
222 for 30 seconds and 72°C for 30 seconds, followed by a final extension at 72°C for 5 minutes.



223 The resulting amplified PCR products were purified with AMPure XP beads (Beckman  
224 Coulter, UK) at 1x sample volume.

225

226 Next an index PCR was performed using 5µL purified PCR products, 5µL of Nextera XT  
227 Index 1 Primers (N7XX), 5µL of Nextera XT Index 2 Primers (S5XX) (both from the  
228 Nextera XT Index kit, Illumina, USA), 10µL PCR grade water and 25 µL of KAPA<sup>®</sup> HiFi  
229 Hot Start ReadyMix (Roche, Switzerland). The following PCR cycling was used: 95°C for 3  
230 minutes, 12 cycles of 95°C for 30 seconds, 55°C for 30 seconds and 72°C for 30 seconds,  
231 followed by a final extension at 72°C for 5 minutes. The final library was purified with  
232 AMPure XP beads, at 1.12x sample volume, before quantification.

233

234 Sequencing was performed on an Illumina<sup>®</sup> MiSeq<sup>®</sup> platform. Libraries were sequenced as  
235 250 bp paired-end reads. Sequences were demultiplexed and filtered for read quality using  
236 Bcl2Fastq conversion software (Illumina, Inc.). In total, 1,156,076 sequences were generated  
237 in the FASTQPhred33 format44.

238

### 239 *Data cleaning and filtering*

240 Sequencing data were imported into the ‘Quantitative Insights Into Microbial Ecology’  
241 pipeline, version 2020.8 (Qiime2)[55], and primary analysis was performed on the reverse  
242 reads, as the quality of the forward reads were not sufficient for merging (Figure S1).  
243 Sequencing primers and adapters were removed using the ‘cutadapt’ plugin[56] with an error  
244 rate of 10%. The divisive amplicon denoising algorithm (DADA2) plugin[57] was used to  
245 ‘denoise’ sequencing reads, removing phiX reads and chimeric sequences, to produce high  
246 resolution, ASVs[58]. DADA2 was run using the denoise-single command, with samples  
247 truncated at 206 nucleotides (trunc-len 206), to remove bases with a low-quality score. All  
248 other parameters were set to default. The resulting feature table[59] and sequences were  
249 filtered to remove ASVs present in the two blank samples and those with a frequency of  
250 below 100 to reduce biases in comparison of diversity indices across groups, and especially  
251 in differential abundance tests.

### 252 *Taxonomic annotation*

253 Taxonomic annotation of ASVs was performed using the -feature-classifier plugin[60], with a  
254 Naïve-Bayes classifier[61] pretrained on the *I6S* SILVA reference (99% identity) database  
255 version 132. The -extract-reads command was used to trim the reference sequences to span  
256 the V3-V4 region (425bp) of the *I6S rRNA* gene. Any features not classified to phylum level  
257 were also removed, these included hosts’ mitochondrial *I6S rRNA* genes. The resulting ASV  
258 table was exported into R (version 3.6.3) for analysis with the phyloseq package.

### 259 *Bacterial diversity analysis*

260 A rooted and unrooted phylogenetic tree was generated using the qiime phylogeny  
261 plugin[62][63][64] and were used to compute alpha and beta diversity metrics using the  
262 qiime2-diversity[65] plugin. For alpha diversity metrics, samples were rarefied[66] at a depth  
263 of 2359; where alpha rarefaction curves plateaued, indicating that there was adequate  
264 sampling of the microbiota during sequencing. Beta diversity metrics were computed for both  
265 rarefied and non-rarefied data, with no significant differences between methods (Table S2);  
266 non-rarefied data are presented herein. 2-3 day old and 5-6 day old mosquitoes were analysed

267 separately, as age was shown to significantly impact the bacterial composition of the  
268 microbiota.

269 Two methods of alpha diversity were selected: Shannon diversity Index, which considers the  
270 abundance and evenness of ASVs present, and Faith's Phylogenetic Diversity, a measure of  
271 community richness which incorporates phylogenetic relationships between species. Pairwise  
272 Kruskal-Wallis comparisons of these alpha diversity indices between groups of insecticide  
273 resistance phenotypes were performed, with Benjamini-Hochberg false discovery rate (FDR)  
274 correction for multiple comparisons[67]. Significance was set to FDR adjusted  $p$  value i.e.  $q$   
275 value  $< 0.05$ .

276 Bray-Curtis Dissimilarity Index[68][69], which measures differences in relative species  
277 composition between samples, was chosen as the beta diversity metric. Comparisons of this  
278 index between insecticide resistance phenotype groups were conducted using pairwise  
279 PERMANOVA tests with 999 permutations[70]. Results were visualised using PCoA  
280 generated using the phyloseq[71] package. Significance was set to  $p$  value  $< 0.05$ .

281 *Determination of association between microbiota composition and insecticide resistance*  
282 *phenotype, and identification of differentially abundant microbial taxa*

283 Comparison of alpha and beta diversity indices indicated that both insecticide resistance  
284 phenotype and mosquito age affected the bacterial composition of *An. coluzzii* in this study.  
285 Following taxonomic annotation of ASVs, multinomial regression and differential abundance  
286 analysis was performed using Songbird[72] to determine the microbial taxa which were  
287 associated with and differentially abundant across insecticide resistance phenotype for  
288 mosquitoes separated by age group. Songbird is a compositionally aware differential  
289 abundance method which ranks features based on their log fold change with respect to  
290 covariates of interest[72] The following Songbird parameters were used: epochs 10000,  
291 number of random test examples 15, differential prior 0.5. The fit of the model was tested  
292 against the null hypothesis (-p-formula "1"). Differential log ratios of features were computed  
293 in Qurro[73]. We present the highest and lowest 10% ranked features associated with  
294 resistance phenotype. Analysis of Composition of Microbiome method (ANCOM) was used  
295 to complement Songbird analysis, and this was computed using the composition plugin[74]  
296 with all parameters set to default. Significance was determined using the automatic cut off for  
297 the test statistic,  $W$ [75].

298 *Quantitative PCR (qPCR) validation of sequencing data*

299 The abundance of *Serratia spp.* and *Asaia spp.* was assessed using qPCR, relative to the  
300 nuclear single-copy *An. gambiae* s.l. ribosomal protein S7 housekeeping gene (*RPS7*).  
301 *Serratia* reactions contained 1 $\mu$ L of 10 $\mu$ M forward primer (5'-  
302 CCGCGAAGGCAAAGTGCACGAACA-3'), 1 $\mu$ L of 10 $\mu$ M reverse primer (5'-  
303 CTTGGCCAGAAGCGCACCATAG-3')[76], 2 $\mu$ L of pooled DNA and 5 $\mu$ L LightCycler®  
304 480 SYBR Green Master Mix (Roche, UK), for a final reaction volume of 10 $\mu$ L. Prepared  
305 reactions were run on an Agilent Technologies Stratagene Mx3005P qPCR system which  
306 performed 40 cycles of 95°C for 15 seconds and 60°C for 1 minute, followed by a  
307 dissociation curve. *Asaia* reactions contained 1 $\mu$ L of 10 $\mu$ M forward primer (5'-  
308 GCGCGTAGGCGGTTTACAC-3'), 1 $\mu$ L of 10 $\mu$ M reverse primer (5'-  
309 AGCGTCAGTAATGAGCCAGGTT-3')[77], 2 $\mu$ L of pooled DNA and 5 $\mu$ L LightCycler®  
310 480 SYBR Green Master Mix (Roche, UK), for a final reaction volume of 10 $\mu$ L. Prepared

311 reactions were run on an Agilent Technologies Stratagene Mx3005P qPCR system with the  
312 following conditions: 95°C for 15 minutes, 40 cycles of 95°C for 10 seconds, 60°C for 10  
313 seconds and 72°C for 10 seconds, followed by a dissociation curve. *RSP7* reactions contained  
314 1µL of 10µM forward primer (5'-TCCTGGAGCTGGAGATGA AC-3'), 1µL of 10µM  
315 reverse primer (5'-GACGGGTCTGTACCTTCT GG-3'), [78]2µL of pooled DNA and 5µL  
316 LightCycler® 480 SYBR Green Master Mix (Roche, UK), for a final reaction volume of  
317 10µL. Prepared reactions were run on an Agilent Technologies Stratagene Mx3005P qPCR  
318 system with the following conditions: 40 cycles of: 95°C for 10 seconds, 65°C for 60 seconds  
319 and 97°C for 1 second, followed by a dissociation curve. All samples were run in technical  
320 triplicate. Relative bacterial abundance was normalised relative to the endogenous control  
321 gene (*RPS7*). qPCR results were analysed using the MxPro software (Agilent Technologies).  
322

## 323 **Results**

### 324 *Species identification and deltamethrin resistance profiles*

325 In total, 580 *An. gambiae* s.l. were collected from Agboville using human-landing catches  
326 (HLCs), during the rainy season in July 2019. Of these, 245 (42%) laid eggs via forced  
327 oviposition. Following larval development, 1015 F<sub>1</sub> *An. gambiae* s.l. pupae were identified as  
328 female and tested in deltamethrin resistance intensity assays as 2-3 day old adults. Individuals  
329 were classified as susceptible if they were knocked-down following exposure to 1x  
330 deltamethrin, resistant if they survived 60 minutes (2-3 day old) or 72 hours (5-6 day old)  
331 post-exposure to 1x, 5x or 10x deltamethrin, or controls if they were unexposed to insecticide  
332 (comprising a mix of age-matched individuals of unknown phenotype). A total of 380  
333 mosquitoes were randomly selected for DNA extraction, across all exposure and time groups,  
334 with 338 individuals identified as *An. coluzzii* (78.3%). From the remaining individuals, 31  
335 were *An. gambiae* s.s. (8.1%), 10 failed to amplify (2.6%), and one individual was an *An.*  
336 *gambiae* s.s.–*An. coluzzii* hybrid (0.26%). Table S1 summarises the number of mosquitoes  
337 selected for DNA extraction, pooling and sequencing.

338

### 339 *Sequencing metrics*

340 A total of 1,156,076 reverse reads were obtained from sequencing. Quality control and  
341 denoising resulted in 2,999 unique amplicon sequence variants (ASVs), 878,155 in total.  
342 Filtering of ASVs associated with water and ethanol blanks, low frequency ASVs and ASVs  
343 not classified to phylum level resulted in 210 unique ASVs, totalling 556,254 across 94 pools  
344 of mosquitoes. Table S3 summarises the number of sequences processed per sample and the  
345 number of reads remaining after denoising and filtering.

346

### 347 *Susceptible *An. coluzzii* had microbiota which were significantly different to, and less diverse than, resistant mosquitoes*

349 Comparison of the Bray-Curtis dissimilarity index using pair-wise PERMANOVA with 999  
350 permutations showed significant differences in bacterial composition between microbiota of  
351 2-3 day old deltamethrin resistant and susceptible *An. coluzzii* (pseudo-F = 19.44, p=0.0015).  
352 Principal Coordinate Analysis (PCoA) visualisations showed the microbiota of susceptible



353 mosquitoes clustered away from resistant and control mosquitoes (Figure 1), indicating that  
354 the microbiota of susceptible mosquitoes were more similar to each other than to resistant and  
355 control mosquitoes.

356 Susceptible mosquitoes had significantly lower Shannon and Faith Phylogenetic Diversity  
357 indices than resistant (Shannon:  $H=13.91$ ,  $q=0.0003$ , Faith:  $H=6.68$ ,  $q=0.01$ ) and control  
358 mosquitoes (Shannon:  $H=22.6$   $q=0.000006$ , Faith:  $H=16.6$ ,  $q=0.0001$ ) of the same age,  
359 indicating that the susceptible group had reduced microbial diversity. There was no  
360 significant difference in alpha or beta diversity in deltamethrin exposed and unexposed 5-6  
361 day old mosquitoes (Shannon:  $H=5.12$ ,  $q=0.02$ , Faith:  $H=0.27$ ,  $q=0.6$ , Bray-Curtis: pseudo-  
362  $F=1.61$ ,  $q=0.17$ ), suggesting that insecticide exposure during the CDC bottle bioassays had  
363 minimal impact on microbial composition.

364

365

<Insert Figure 1>

366

367 **Figure 1. PCoA plot showing Bray Curtis distance of microbiota between resistant,**  
368 **susceptible and control F<sub>1</sub> 2-3 day old adult *An. coluzzii*.** Each point represents the  
369 bacterial composition of a pool of three mosquitoes of the same resistance phenotype. There  
370 was a distinct separation between resistant/control and susceptible mosquitoes, which was  
371 shown to be a significant difference using a pairwise PERMANOVA (999 permutations)  
372 (pseudo- $F=19.44$ ,  $p=0.0015$ ).

373

374

375 *Serratia* and *Asaia* dominated in older, and younger susceptible *An. coluzzii*

376 Following taxonomic annotation of ASVs to the genus or lowest possible taxonomic level,  
377 114 and 57 bacterial taxa were detected in 2-3 day old and 5-6 day old mosquitoes,  
378 respectively. The less diverse 5-6 day old microbiota was predominantly comprised of ASVs  
379 assigned to the genera *Serratia* (75.5%) and *Asaia* (13.6%) (Figure S2). In 2-3 day old  
380 mosquitoes, microbial composition varied by resistance phenotype. Control mosquitoes had  
381 the highest number of taxa present ( $n=97$ ), followed by resistant ( $n=90$ ) and susceptible  
382 ( $n=66$ ). 20 taxa were unique to control mosquitoes, and 15 to resistant mosquitoes. No taxa  
383 were unique to the susceptible group of mosquitoes, and 60 taxa were common to all groups  
384 (Figure 2).

385

386

<Insert Figure 2>

387

388 **Figure 2. Venn diagram showing number of bacterial taxa unique to or shared between**  
389 **pools of 2-3 day old resistant, susceptible or control mosquitoes.** Taxa were identified to  
390 genus level or lowest possible taxonomic rank.  $n$ =number of pools (each pool consists of  
391 three mosquitoes of the same age and phenotype).

392

393 In control mosquitoes, an unclassified species within the Enterobacteriaceae family (15.24%),  
394 *Acinetobacter* (8.83%) and *Staphylococcus* (8.29%) were most abundant, whilst  
395 Enterobacteriaceae (15.12%), *Acinetobacter* (14.26%) and *Serratia* (11.8%) were the most  
396 abundant in resistant mosquitoes. In susceptible mosquitoes, *Serratia* (56.4%) and *Asaia*  
397 (30.92%) were the dominant genera, with *Acinetobacter* (1.96%), Enterobacteriaceae (1.57%)  
398 and *Staphylococcus* (1.4%) present at low abundance (Figure 3). The remaining 61 taxa were  
399 present at an abundance of less than 1% of total ASVs present (Figure S2, Table S4).

400

401

<Insert Figure 3>

402

403 **Figure 3. Raw frequency of ASVs from the microbiota of control (n=14), resistant (n=16)**  
404 **and susceptible (n=28) F<sub>1</sub> 2-3 day old adult *An. coluzzii*.** Each column represents a pool of  
405 three mosquitoes of the same phenotype. ASVs were annotated to genus level or lowest  
406 possible taxonomic level (in square brackets). Only taxonomically annotated ASVs with a  
407 frequency of >150 are shown. Light blue indicates a low frequency of ASVs present, whilst  
408 darker blue indicates a higher frequency. Grey indicates ASV not present in that pool.

409

410 *Differential rankings confirmed Asaia and Serratia were significantly associated with*  
411 *susceptibility and Stenotrophomonas, Ochrobactrum, Lysinibacillus and Alphaproteobacteria*  
412 *were significantly associated with phenotypic resistance*

413 Songbird was used to identify taxa which were differentially abundant in 2-3 day old  
414 resistant, susceptible or control mosquitoes. Evaluation of our Songbird model with  
415 resistance phenotype as the variable, against a baseline model with no variable resulted in a  
416 pseudo Q-squared value of 0.42, indicating that the model had not been overfit and that  
417 roughly 42% of variation in the model was predicted by resistance phenotype (Figure S3).  
418 There were significant differences in the log ratios of highest to lowest ranked taxa between  
419 resistant and susceptible microbiota (Figure 4, Table S5), suggesting that the highest ranked  
420 taxa were significantly overabundant in resistant microbiota, and the lowest ranked taxa were  
421 significantly overabundant in susceptible microbiota.

422

423

424

<Insert Figure 4>

425

426 **Figure 4. Log ratios of 10% highest ranked features to 10% lowest ranked features in**  
427 **control, resistant and susceptible 2-3 day old F<sub>1</sub> *An. coluzzii*.** Susceptible mosquitoes had a  
428 significantly lower ratio than control or resistant mosquitoes indicating that the lowest ranked  
429 features were overabundant in the susceptible group, whilst the highest ranked features were  
430 overabundant in either resistant or control mosquitoes.

431

432

433 *Stenotrophomonas*, *Ochrobactrum*, *Lysinibacillus* and *Alphaproteobacteria* (highest ranked)  
434 were most strongly associated with insecticide resistance whilst *Serratia*, *Aerococcus*, *E.*  
435 *shigella* and *Asaia* (lowest ranked) were most strongly associated with insecticide  
436 susceptibility (Figure 5). Comparing log ratios of control and susceptible pools indicated that  
437 *Rhodococcus*, *Sphingomonas*, *Haemophilus* and *E. shigella* were most strongly associated  
438 with controls, whilst an uncultured Chroococcidiopsaceae, *Serratia*, an unclassified member  
439 of Enterobacteriaceae and *Asaia* were most strongly associated with susceptible mosquitoes  
440 (Table S5).

441

442

<Insert Figure 5>

443

444 **Figure 5. Sorted differential ranks of features associated with resistant or susceptible**  
445 **phenotype in 2-3 day old *An. coluzzii*.** The highest 10% and lowest 10% of ranked features  
446 are shown, coloured by their corresponding assigned taxon. Taxa are shown to genus or  
447 lowest possible taxonomic level (square brackets).

448

449 These results were confirmed by the ANCOM method. *Serratia* (W=208) and *Asaia* (W=208)  
450 were significantly overabundant in susceptible mosquitoes relative to resistant and controls,  
451 whilst *Ochrobactrum* (W=199), *Lysinibacillus* (W=188) and *Enterobacteriaceae* (W=201)  
452 were overabundant in resistant and control mosquitoes (Figure S4).

453

454 *Increased abundance of Serratia and Asaia species in susceptible individuals confirmed by*  
455 *qPCR*

456 Quantitative PCR assays confirmed that *Serratia* was significantly overabundant in 2-3 day  
457 old susceptible mosquitoes compared to deltamethrin resistant (5x p=0.028, 10x p=0.002)  
458 and control (p=0.02) (average CT value for susceptible: -8.4 [95% CI: -9.0 – -7.74]; 5x: -7.43  
459 [-7.9 – -6.9]; 10x -6.3 [-7.2 – -5.4]; control: -7.2 [-7.9 – -6.6]). *Asaia* was also significantly  
460 overabundant in 2-3 day old susceptible mosquitoes compared to resistant (5x p= <0.001, 10x  
461 p<0.001) and control (p<0.001) (average CT values for susceptible: -7.6 [95% CI: -8.5 – -  
462 6.8]; 5x: 0.8 [-1.6 – 3.2]; 10x: 5.1 [3.0 – 7.1]; control: 4.5 [3.3 – 5.7]). Five to six day old  
463 mosquitoes also had increased abundance of both bacterial species (average CT value for 5-6  
464 day old 5x: *Serratia* -8.2 [95% CI: -8.9 – -7.4] *Asaia* -1.3 [-5.6 – 2.9]; 5-6 day old 10x:  
465 *Serratia* -7.5 [-7.9 – -7.1] *Asaia* 5.4 [4.6 – 6.3]; 5-6 day old control *Serratia* -8.7 [-9.6 – -7.8]  
466 and *Asaia* -0.68 [-3.0 – 1.7].

467

468

469

470

## 471 **Discussion**

472 There is increasing evidence for an association between insecticide resistance phenotype[38],  
473 [43], [79] and *Anopheles spp.* microbiota. This study revealed distinct differences between  
474 the microbiota of deltamethrin resistant and susceptible *An. coluzzii*, with significant  
475 enrichment of insecticide degrading taxa in resistant individuals and an overabundance of  
476 *Serratia* and *Asaia* taxa in susceptible individuals. This population of field-caught *An.*  
477 *gambiae* s.l. from Agboville, South-East Côte d'Ivoire has previously been characterised as  
478 intensely resistant to pyrethroids, with average vector mortality of 14.56% [95% CI: 8.92-  
479 22.88%], 61.62% [95% CI: 51.58-70.75%] and 73.79% [95% CI: 64.35-81.45%] to one, five  
480 and ten times the diagnostic dose of deltamethrin, respectively, and pyrethroid resistance  
481 associated with over-expression of CYP450 enzymes (*CYP6P4*, *CYP6Z1* and *CYP6P3*)[45].

482 Our study demonstrated significant differences in alpha and beta diversity between  
483 deltamethrin-resistant and susceptible *An. coluzzii*. Resistant mosquitoes harboured a wider  
484 variety of microbial taxa and had more microbial diversity both within and between  
485 themselves. Susceptible mosquitoes had fewer bacterial taxa and were far more homogenous,  
486 with *Serratia* and *Asaia* dominating in all samples. Previous studies have demonstrated  
487 differences between the microbiota of insecticide resistant and susceptible *An. stephensi*[38],  
488 *An. arabiensis*[42], and *An. gambiae* s.s.[43]. This study is the first to detect an increase in  
489 alpha diversity in resistant mosquitoes with other studies reporting no difference[39], [43] or  
490 a decrease[80]. There are multiple potential reasons for the decreased microbial diversity  
491 previously identified, including processing of individuals rather than pooled mosquitoes, host  
492 species-specific differences, and variability among geographical collection sites[80].  
493 Furthermore, field-caught mosquitoes may be of unknown age and physiological status; prior  
494 environmental insecticide exposure might also be responsible for reducing overall diversity,  
495 as bacteria with the ability to metabolise insecticides have greater access to compounds for  
496 growth and reproduction and can outcompete other species[38]. In our study, larvae were  
497 raised in distilled water, adults were age-standardised, unable to mate or blood-feed and had  
498 no insecticide exposure prior to resistance assays. We therefore consider this inherited  
499 microbiota to be linked to the resistance status of the host, with mosquitoes characterised by a  
500 wider range of bacteria having an increased chance of harbouring an insecticide degrading  
501 strain.

502 The role of bacteria in the degradation of pesticides has been widely studied[36], [37], [81],  
503 mainly due to the interest in bioremediation – use of bacteria to restore pesticide  
504 contaminated soils and water. However, emerging evidence that these bacteria could also  
505 contribute to pesticide resistance is concerning. Our study identified significant enrichment of  
506 several insecticide degrading taxa in resistant compared with susceptible mosquitoes:  
507 *Ochrobactrum*, *Lysinibacillus* and *Stenotrophomonas*. *Ochrobactrum spp.* have been isolated  
508 from contaminated soil, and shown to degrade a variety of insecticides including  
509 pyrethroids[82], [83] and organophosphates[84], [85]. Similarly, *Lysinibacillus spp.* derived  
510 from soil and sewage can metabolise deltamethrin[86] and cyfluthrin[87] whilst  
511 *Stenotrophomonas* in the microflora of cockroaches living in pesticide treated environments  
512 can degrade endosulfan *in vitro*[88]. Elevated expression of xenobiotic degrading genes[86]

513 and enzymes[38] may be contributing to the insecticide degrading properties of these bacteria  
514 as well as direct degradation of pesticides.

515 While certain species of bacteria can confer insecticide resistance to the host, others may  
516 influence susceptibility. Indigenous gut bacteria have been implicated in the susceptibility of  
517 the gypsy moth, *L. dispar*, to the insecticidal toxin *Bacillus (B.) thuringiensis*. Treatment of  
518 larvae with antibiotics eliminated gut microbiota, and subsequently reduced mortality to *B.*  
519 *thuringiensis*; susceptibility was restored upon oral administration of *Enterobacter sp.*, a  
520 gram negative bacterium widely present in the *L. dispar* gut[89]. In our study, *Serratia* and  
521 *Asaia* were found to be significantly overabundant in susceptible mosquitoes. Whilst there  
522 are no prior reports of an association of these species with mosquito insecticide resistance  
523 phenotype, when the relative abundance of *Serratia sp.* in the gut of the diamondback moth  
524 was increased, susceptibility to chlorpyrifos significantly increased[81]. *Serratia marcescens*  
525 plays a role in the susceptibility of field-caught *Aedes* to dengue virus infection by secreting  
526 *SmEnhancin*, an enzyme which digests gut epithelia mucins, enabling the virus to penetrate  
527 the gut[35]. The Bel protein, similar to *SmEnhancin*, and produced by the bacteria *B.*  
528 *thuringiensis*, has been shown to significantly increase the toxicity of Cry1Ac toxin in the  
529 cotton bollworm larvae, *Helicoverpa armigera*; by perforating the midgut peritrophic matrix  
530 and degrading the insect intestinal mucin, enabling the toxin to reach the target epithelial  
531 membrane[90]. A similar mechanism may occur in these mosquitoes, whereby proteins  
532 produced by *Serratia spp.* increase the permeability of the internal organs to deltamethrin,  
533 enabling it to reach its target in the mosquito nervous system.

534 *Asaia* and *Serratia sp.* have also both previously been implicated in modulation of *Anopheles*  
535 vector competence. *Asaia sp.* have been shown to activate antimicrobial peptide expression  
536 in *An. stephensi*[91] while some strains of *S. marcescens* isolated from *An. sinensis* can  
537 inhibit *Plasmodium* development by altering the immunity-related effector genes TEP1 and  
538 FBN9[27] *Serratia spp.* may also directly inhibit malaria parasite development by secretion  
539 of serralysin proteins and prodigiosin, which can have a pathogen-killing effect *in vitro*[92];  
540 the latter can also act as a larvicidal agent against *Ae. aegypti* and *An. stephensi*[93]. By  
541 comparison, the presence of a dominant commensal Enterobacteriaceae has been positively  
542 correlated with *Plasmodium* infection[33]. Elucidating the impact of mosquito host  
543 microbiota composition and molecular and metabolic resistance mechanisms on parasite  
544 infection dynamics is crucial for the design of novel transmission-blocking strategies.

545 No significant difference in the microbiota of deltamethrin exposed and unexposed  
546 mosquitoes was observed at 60 minutes or 72 hours post-exposure. One hour is likely  
547 insufficient time for the microbial composition to significantly shift in response to  
548 insecticide, given the relatively slow rate of bacterial growth, and the fact that any bacteria  
549 killed by insecticide exposure would still have been present during microbiota extraction. At  
550 72 hours, differences in the microbiota of exposed and unexposed mosquitoes, if present,  
551 should have been apparent. The lack of difference observed may in part be due to the low  
552 sample size of the 5 day old 10x resistant group and may also reflect the short insecticide  
553 contact time. Bioassays are a single exposure at a lethal dose in a sterile environment used to  
554 determine resistance phenotype[51]. In the wild, multiple insecticide exposures are likely to  
555 happen at sub-lethal doses at both the larval stage, as habitats are contaminated with  
556 agricultural pesticides, and adult stage, as there is frequent interaction with treated surfaces or  
557 materials indoors[94]. Bioassays may therefore not induce the same shifts in microbiota as



558 insecticide exposure in the wild. Furthermore, as mosquitoes acquire most of their microbiota  
559 from the aquatic environment at the larval stage[21], and may obtain insecticide metabolising  
560 bacteria at this stage, studying the effects of deltamethrin exposure on larvae, or adults which  
561 were exposed as larvae, may be more informative.

562 Our results demonstrated a significant relative reduction in alpha diversity in resistant and  
563 control 5-6 day old mosquitoes compared with the 2-3 day old group, as expected based on  
564 prior reports that microbial diversity declines with age[50]. Older mosquitoes also had lower  
565 relative abundances of *Ochrobactrum*, *Lysinibacillus* and *Stenotrophomonas*, the insecticide  
566 degrading species shown to be significantly enriched in resistant 2-3 day old individuals.  
567 *Serratia* and *Asaia*, the species associated with susceptibility, were present in increased  
568 abundance in the older age group. It has been widely reported that insecticide resistance  
569 declines with age[95]–[100]. The shift in microbiota may also be a contributing factor, and  
570 further research is warranted to determine the association between the microbiota, resistance  
571 phenotype and age.

572 In our study, qPCR detection of *Serratia* and *Asaia* was consistent with the 16S rRNA  
573 sequencing data, with susceptible mosquitoes having significantly lower CT values than  
574 resistant or control individuals. Population-level field screening using qPCR, as a cheaper,  
575 faster and more feasible option than amplicon sequencing, should be considered for  
576 integration in wider insecticide resistance monitoring, if reliable and reproducible bacterial  
577 markers associated with phenotype can be identified.

## 578 **Conclusions**

579 Insecticide susceptibility is influenced by a range of diverse factors including host genetics,  
580 detoxification systems and behaviour as well as the mosquito microbiota. We report  
581 significant differences in the microbiota of deltamethrin-resistant *An. coluzzii* and have  
582 identified several bacterial species which were associated with either resistance or  
583 susceptibility to the host and therefore may represent important markers of resistance  
584 phenotype. The role of bacteria in determining resistance phenotype is highly complex and  
585 specific to the host and bacterial species, and insecticide and likely involves multiple, parallel  
586 mechanisms, including direct degradation of insecticide, altered host immune system, and  
587 changes to the midgut. In addition, these interactions may have important implications for  
588 host species fitness, vector competence and pathogen development and transmission. Further  
589 investigation into the mechanisms of microbiota mediated susceptibility is necessary as this  
590 may provide opportunities for preventing or reducing insecticide resistance, which is crucial  
591 to maintain gains in malaria vector control.

## 592 **Declarations**

## 593 **Ethics approval and consent to participate**

594 The study protocol was reviewed and approved by the Comité National d’Ethique des  
595 Sciences de la Vie et de la Santé (#069-19/MSHP/CNESVS-kp) and the institutional review  
596 board (IRB) of the London School of Hygiene and Tropical Medicine (#16860); all study  
597 procedures were performed in accordance with relevant guidelines and regulations. Prior to  
598 study initiation, community consent was sought from village leaders and written, informed  
599 consent was obtained from the heads of all households selected for participation and from all

600 fieldworkers who performed HLCs. Fieldworkers participating in HLCs were provided with  
601 doxycycline malaria prophylaxis for the duration of the study.

### 602 **Consent for publication**

603 Not applicable

### 604 **Availability of data and material**

605 Sequence data generated by this study is available at Sequence Read Archive (SRA)  
606 BioProject PRJNA702915 (accession numbers: SRR13743435 – SRR13743530). All other  
607 relevant data are available from the corresponding author upon reasonable request.

608 Codes can be accessed at the public repository Zenodo (<http://zenodo.org>) under  
609 <https://doi.org/10.5281/zenodo.4548776>

610

### 611 **Competing interests**

612 The authors declare that they have no competing interests.

613

### 614 **Funding**

615 This study was supported by the Sir Halley Stewart Trust (LAM) and the Wellcome  
616 Trust/Royal Society (<http://www.wellcome.ac.uk> and <https://royalsociety.org>; 101285/Z/13/Z  
617 to TW). CE was also supported by the Wellcome Trust (110430/Z/15/Z). BP was supported  
618 by the LSHTM-Nagasaki University Joint PhD Programme for Global Health.

619

### 620 **Author Contributions**

621 ND, LAM, BP, and TW designed the study. BP, EC, AM and CE conducted fieldwork and  
622 BP, MK and LAM undertook mosquito rearing, phenotyping and preparation of samples for  
623 sequencing. Laboratory supervision was provided by LAM, CLJ and TW. BP, ND, and LAM  
624 performed the data analysis; and BP and LAM drafted the manuscript. All authors read and  
625 approved the final manuscript.

626

### 627 **Acknowledgements**

628 The authors express their sincere thanks to Fidele Assamoah, Claver Adjobi and Laurent  
629 Didier Dobri, laboratory technicians at Centre Suisse de Recherches Scientifiques en Côte  
630 d'Ivoire (CSRS), for their support in mosquito collection and rearing; the chief and  
631 population of the village of Aboudé (Agboville), and the entomology fieldworkers of CSRS.

632

### 633 **Supplementary Information**

634 Description of Supplementary Files

635 Table S1

636 Table S2

637 Table S3

638 Table S4

639 Table S5

640 Figure S1

641 Figure S2

642 Figure S3

643 Figure S4

644

645 **References**

646 [1] World Health Organization, “World Malaria Report 2020: 20 years of global progress  
647 and challenges.” 2020. [Online]. Available: [https://www.who.int/teams/global-](https://www.who.int/teams/global-malaria-programme/reports/world-malaria-report-2020)  
648 [malaria-programme/reports/world-malaria-report-2020](https://www.who.int/teams/global-malaria-programme/reports/world-malaria-report-2020). [Accessed: 15-Dec-2020].

649 [2] World Health Organization, “World malaria report 2019.” [Online]. Available:  
650 <https://www.who.int/publications/i/item/world-malaria-report-2019>. [Accessed: 26-  
651 Oct-2020].

652 [3] World Health Organization, “Prequalified Vector Control Products.” [Online].  
653 Available: [https://www.who.int/pq-vector-control/prequalified-lists/VCP\\_PQ-](https://www.who.int/pq-vector-control/prequalified-lists/VCP_PQ-List_26August2020.pdf?ua=1)  
654 [List\\_26August2020.pdf?ua=1](https://www.who.int/pq-vector-control/prequalified-lists/VCP_PQ-List_26August2020.pdf?ua=1). [Accessed: 26-Oct-2020].

655 [4] C. Clarkson, A. Miles, N. Harding, D. Weetman, D. Kwiatkowski, and M. Donnelly,  
656 “The genetic architecture of target-site resistance to pyrethroid insecticides in the  
657 African malaria vectors *Anopheles gambiae* and *Anopheles coluzzii*,” *bioRxiv*, p.  
658 323980, Aug. 2018.

659 [5] L. M. J. Mugenzi *et al.*, “Cis-regulatory CYP6P9b P450 variants associated with loss  
660 of insecticide-treated bed net efficacy against *Anopheles funestus*,” *Nat. Commun.*,  
661 vol. 10, no. 1, pp. 1–11, Dec. 2019.

662 [6] B. S. Assogba *et al.*, “An ace-1 gene duplication resorbs the fitness cost associated  
663 with resistance in *Anopheles gambiae*, the main malaria mosquito,” *Sci. Rep.*, vol. 5,  
664 no. 1, p. 14529, Oct. 2015.

665 [7] X. Grau-Bové *et al.*, “Resistance to pirimiphos-methyl in West African *Anopheles* is  
666 spreading via duplication and introgression of the *Ace1* locus,” *bioRxiv*, p.  
667 2020.05.18.102343, May 2020.

668 [8] P. Müller *et al.*, “Field-Caught Permethrin-Resistant *Anopheles gambiae* Overexpress  
669 CYP6P3, a P450 That Metabolises Pyrethroids,” *PLoS Genet.*, vol. 4, no. 11, p.  
670 e1000286, Nov. 2008.

671 [9] B. J. Stevenson *et al.*, “Cytochrome P450 6M2 from the malaria vector *Anopheles*  
672 *gambiae* metabolizes pyrethroids: Sequential metabolism of deltamethrin revealed,”

- 673 *Insect Biochem. Mol. Biol.*, vol. 41, no. 7, pp. 492–502, Jul. 2011.
- 674 [10] T. L. Chiu, Z. Wen, S. G. Rupasinghe, and M. A. Schuler, “Comparative molecular  
675 modeling of *Anopheles gambiae* CYP6Z1, a mosquito P450 capable of metabolizing  
676 DDT,” *Proc. Natl. Acad. Sci. U. S. A.*, vol. 105, no. 26, pp. 8855–8860, Jul. 2008.
- 677 [11] S. S. Ibrahim, J. M. Riveron, R. Stott, H. Irving, and C. S. Wondji, “The cytochrome  
678 P450 CYP6P4 is responsible for the high pyrethroid resistance in knockdown  
679 resistance-free *Anopheles arabiensis*,” *Insect Biochem. Mol. Biol.*, vol. 68, pp. 23–32,  
680 Jan. 2016.
- 681 [12] J. M. Riveron *et al.*, “A single mutation in the GSTe2 gene allows tracking of  
682 metabolically based insecticide resistance in a major malaria vector,” *Genome Biol.*,  
683 vol. 15, no. 2, p. R27, 2014.
- 684 [13] V. A. Ingham, P. Pignatelli, J. D. Moore, S. Wagstaff, and H. Ranson, “The  
685 transcription factor Maf-S regulates metabolic resistance to insecticides in the malaria  
686 vector *Anopheles gambiae*,” *BMC Genomics*, vol. 18, no. 1, Aug. 2017.
- 687 [14] V. A. Ingham, S. Wagstaff, and H. Ranson, “Transcriptomic meta-signatures identified  
688 in *Anopheles gambiae* populations reveal previously undetected insecticide resistance  
689 mechanisms,” *Nat. Commun.*, vol. 9, no. 1, Dec. 2018.
- 690 [15] V. A. Ingham *et al.*, “A sensory appendage protein protects malaria vectors from  
691 pyrethroids,” *Nature*, vol. 577, no. 7790, pp. 376–380, 2020.
- 692 [16] A. T. Isaacs, H. D. Mawejje, S. Tomlinson, D. J. Rigden, and M. J. Donnelly,  
693 “Genome-wide transcriptional analyses in *Anopheles* mosquitoes reveal an unexpected  
694 association between salivary gland gene expression and insecticide resistance,” *BMC*  
695 *Genomics*, vol. 19, no. 1, p. 225, 2018.
- 696 [17] V. Balabanidou *et al.*, “Mosquitoes cloak their legs to resist insecticides,” *Proc. R.*  
697 *Soc. B Biol. Sci.*, vol. 286, no. 1907, Jul. 2019.
- 698 [18] C. S. Clarkson *et al.*, “Genome variation and population structure among 1142  
699 mosquitoes of the African malaria vector species *Anopheles gambiae* and *Anopheles*  
700 *coluzzii*,” *Genome Res.*, vol. 30, no. 10, pp. 1533–1546, Oct. 2020.
- 701 [19] A. Miles *et al.*, “Genetic diversity of the African malaria vector *Anopheles gambiae*,”  
702 *Nature*, vol. 552, no. 7683, pp. 96–100, Dec. 2017.
- 703 [20] G. Favia *et al.*, “Bacteria of the genus *Asaia* stably associate with *Anopheles stephensi*,  
704 an Asian malarial mosquito vector,” *Proc. Natl. Acad. Sci. U. S. A.*, vol. 104, no. 21,  
705 pp. 9047–51, May 2007.
- 706 [21] G. Gimonneau *et al.*, “Composition of *Anopheles coluzzii* and *Anopheles gambiae*  
707 microbiota from larval to adult stages,” *Infect. Genet. Evol.*, vol. 28, pp. 715–724, Dec.  
708 2014.
- 709 [22] L. C. Ezemuoka, E. A. Akorli, F. Aboagye-Antwi, and J. Akorli, “Mosquito midgut  
710 *Enterobacter cloacae* and *Serratia marcescens* affect the fitness of adult female  
711 *Anopheles gambiae* s.l.,” *PLoS One*, vol. 15, no. 9, p. e0238931, Sep. 2020.
- 712 [23] E. V Kozlova *et al.*, “Microbial interactions in the mosquito gut determine *Serratia*  
713 colonization and blood-feeding propensity,” *ISME J.*, 2020.

- 714 [24] A. D. O. Gaio, D. S. Gusmão, A. V. Santos, M. A. Berbert-Molina, P. F. P. Pimenta,  
715 and F. J. A. Lemos, “Contribution of midgut bacteria to blood digestion and egg  
716 production in *aedes aegypti* (diptera: Culicidae) (L.),” *Parasites and Vectors*, vol. 4,  
717 no. 1, 2011.
- 718 [25] A. Cappelli *et al.*, “Asaia activates immune genes in mosquito eliciting an anti-  
719 plasmodium response: Implications in malaria control,” *Front. Genet.*, vol. 10, no.  
720 SEP, Sep. 2019.
- 721 [26] A. Muhammad, P. Habineza, T. Ji, Y. Hou, and Z. Shi, “Intestinal Microbiota Confer  
722 Protection by Priming the Immune System of Red Palm Weevil *Rhynchophorus*  
723 *ferrugineus* Olivier (Coleoptera: Dryophthoridae),” *Front. Physiol.*, vol. 10, Oct. 2019.
- 724 [27] L. Bai, L. Wang, J. Vega-Rodríguez, G. Wang, and S. Wang, “A Gut Symbiotic  
725 Bacterium *Serratia marcescens* Renders Mosquito Resistance to Plasmodium Infection  
726 Through Activation of Mosquito Immune Responses,” *Front. Microbiol.*, vol. 10, no.  
727 JULY, p. 1580, Jul. 2019.
- 728 [28] N. Jupatanakul, S. Sim, and G. Dimopoulos, “The insect microbiome modulates vector  
729 competence for arboviruses,” *Viruses*, vol. 6, no. 11. MDPI AG, pp. 4294–4313, 11-  
730 Nov-2014.
- 731 [29] C. M. Cirimotich, Y. Dong, L. S. Garver, S. Sim, and G. Dimopoulos, “Mosquito  
732 immune defenses against Plasmodium infection,” *Developmental and Comparative*  
733 *Immunology*, vol. 34, no. 4. Dev Comp Immunol, pp. 387–395, Apr-2010.
- 734 [30] N. J. Dennison, R. G. Saraiva, C. M. Cirimotich, G. Mlambo, E. F. Mongodin, and G.  
735 Dimopoulos, “Functional genomic analyses of *Enterobacter*, *Anopheles* and  
736 *Plasmodium* reciprocal interactions that impact vector competence,” *Malar. J.*, vol. 15,  
737 no. 1, Aug. 2016.
- 738 [31] L. Gonzalez-Ceron, F. Santillan, M. H. Rodriguez, D. Mendez, and J. E. Hernandez-  
739 Avila, “Bacteria in Midguts of Field-Collected &lt;I&gt;Anopheles  
740 *albimanus*&lt;I&gt; Block &lt;I&gt;Plasmodium vivax&lt;I&gt; Sporogonic  
741 Development,” *J. Med. Entomol.*, vol. 40, no. 3, pp. 371–374, May 2003.
- 742 [32] Y. Dong, F. Manfredini, and G. Dimopoulos, “Implication of the Mosquito Midgut  
743 Microbiota in the Defense against Malaria Parasites,” *PLoS Pathog.*, vol. 5, no. 5, p.  
744 e1000423, May 2009.
- 745 [33] A. Boissière *et al.*, “Midgut Microbiota of the Malaria Mosquito Vector *Anopheles*  
746 *gambiae* and Interactions with *Plasmodium falciparum* Infection,” *PLoS Pathog.*, vol.  
747 8, no. 5, p. e1002742, May 2012.
- 748 [34] M. Gendrin *et al.*, “Antibiotics in ingested human blood affect the mosquito  
749 microbiota and capacity to transmit malaria,” *Nat. Commun.*, vol. 6, Jan. 2015.
- 750 [35] P. Wu *et al.*, “A Gut Commensal Bacterium Promotes Mosquito Permissiveness to  
751 Arboviruses,” *Cell Host Microbe*, vol. 25, no. 1, pp. 101-112.e5, Jan. 2019.
- 752 [36] X. Xia *et al.*, “DNA Sequencing Reveals the Midgut Microbiota of Diamondback  
753 Moth, *Plutella xylostella* (L.) and a Possible Relationship with Insecticide Resistance,”  
754 *PLoS One*, vol. 8, no. 7, p. e68852, Jul. 2013.
- 755 [37] Y. Kikuchi, M. Hayatsu, T. Hosokawa, A. Nagayama, K. Tago, and T. Fukatsu,  
756 “Symbiont-mediated insecticide resistance,” *Proc. Natl. Acad. Sci.*, vol. 109, no. 22,



- 757 pp. 8618–8622, May 2012.
- 758 [38] N. Dada, M. Sheth, K. Liebman, J. Pinto, and A. Lenhart, “Whole metagenome  
759 sequencing reveals links between mosquito microbiota and insecticide resistance in  
760 malaria vectors.,” *Sci. Rep.*, vol. 8, no. 1, p. 2084, 2018.
- 761 [39] N. Dada *et al.*, “Pyrethroid exposure alters internal and cuticle surface bacterial  
762 communities in *Anopheles albimanus*,” *ISME J.*, 2019.
- 763 [40] A. Arévalo-Cortés, A. M. Mejia-Jaramillo, Y. Granada, H. Coatsworth, C.  
764 Lowenberger, and O. Triana-Chavez, “The Midgut Microbiota of Colombian *Aedes*  
765 *aegypti* Populations with Different Levels of Resistance to the Insecticide Lambda-  
766 cyhalothrin,” *Insects*, vol. 11, no. 9, p. 584, Sep. 2020.
- 767 [41] A. Soltani, H. Vatandoost, M. A. Oshaghi, A. A. Enayati, and A. R. Chavshin, “The  
768 role of midgut symbiotic bacteria in resistance of *Anopheles stephensi* (Diptera:  
769 Culicidae) to organophosphate insecticides,” *Pathog. Glob. Health*, vol. 111, no. 6, pp.  
770 289–296, Aug. 2017.
- 771 [42] K. Barnard, A. C. S. N. Jeanrenaud, B. D. Brooke, and S. V Oliver, “The contribution  
772 of gut bacteria to insecticide resistance and the life histories of the major malaria  
773 vector *Anopheles arabiensis* (Diptera: Culicidae),” *Sci. Rep.*, vol. 9, no. 1, p. 9117,  
774 2019.
- 775 [43] D. Omoke *et al.*, “Western Kenyan *Anopheles gambiae* showing intense permethrin  
776 resistance harbour distinct microbiota,” *Malar. J.*, vol. 20, no. 1, p. 77, 2021.
- 777 [44] M. du P. et du D. (MPD) Institut National de la Statistique (INS), M. de la S. et de  
778 l’Hygiène P. (MSHP) Programme National de Lutte contre le Paludisme (PNLP), I.  
779 The DHS Program, and U. Rockville, Maryland, “Côte d’Ivoire Enquête de prévalence  
780 parasitaire du paludisme et de l’anémie 2016.”
- 781 [45] A. Meiwald *et al.*, “Reduced long-lasting insecticidal net efficacy and pyrethroid  
782 insecticide resistance are associated with over-expression of CYP6P4, CYP6P3 and  
783 CYP6Z1 in populations of *Anopheles coluzzii* from South-East Côte d’Ivoire,” *J.*  
784 *Infect. Dis.*, Nov. 2020.
- 785 [46] B. K. Fodjo *et al.*, “Insecticides Resistance Status of *An. gambiae* in Areas of Varying  
786 Agrochemical Use in Côte D’Ivoire,” *Biomed Res. Int.*, vol. 2018, pp. 1–9, Oct. 2018.
- 787 [47] M. T. Gillies and M. Coetzee, “A supplement to the Anophelinae of Africa south of  
788 the Sahara (Afrotropical Region).,” *A Suppl. to Anophelinae Africa south Sahara*  
789 *(Afrotropical Reg.)*, 1987.
- 790 [48] J. C. Morgan, H. Irving, L. M. Okedi, A. Steven, and C. S. Wondji, “Pyrethroid  
791 Resistance in an *Anopheles funestus* Population from Uganda,” *PLoS One*, vol. 5, no.  
792 7, p. e11872, Jul. 2010.
- 793 [49] Nishikoi Aquaculture Ltd, “Nishikoi Aquaculture Ltd.” [Online]. Available:  
794 <https://www.nishikoi.com/>. [Accessed: 23-Nov-2020].
- 795 [50] Y. Wang, T. M. Gilbreath, P. Kukutla, G. Yan, and J. Xu, “Dynamic Gut Microbiome  
796 across Life History of the Malaria Mosquito *Anopheles gambiae* in Kenya,” *PLoS*  
797 *One*, vol. 6, no. 9, p. 24767, 2011.
- 798 [51] “Guideline for Evaluating Insecticide Resistance in Vectors Using the CDC Bottle

- 799 Bioassay.”
- 800 [52] “(EN) - DNeasy Blood & Tissue Handbook - QIAGEN.” [Online]. Available:  
801 [https://www.qiagen.com/gb/resources/resourcedetail?id=6b09dfb8-6319-464d-996c-](https://www.qiagen.com/gb/resources/resourcedetail?id=6b09dfb8-6319-464d-996c-79e8c7045a50&lang=en)  
802 [79e8c7045a50&lang=en](https://www.qiagen.com/gb/resources/resourcedetail?id=6b09dfb8-6319-464d-996c-79e8c7045a50&lang=en). [Accessed: 14-Feb-2020].
- 803 [53] F. Santolamazza, E. Mancini, F. Simard, Y. Qi, Z. Tu, and A. della Torre, “Insertion  
804 polymorphisms of SINE200 retrotransposons within speciation islands of *Anopheles*  
805 *gambiae* molecular forms,” *Malar. J.*, vol. 7, no. 1, p. 163, Aug. 2008.
- 806 [54] “KAPA HiFi HotStart ReadyMix | Roche Sequencing Store.” [Online]. Available:  
807 <https://rochesequencingstore.com/catalog/kapa-hifi-hotstart-readymix/>. [Accessed: 14-  
808 Feb-2020].
- 809 [55] E. Bolyen *et al.*, “Reproducible, interactive, scalable and extensible microbiome data  
810 science using QIIME 2,” *Nat. Biotechnol.*, vol. 37, no. 8, pp. 852–857, Aug. 2019.
- 811 [56] M. Martin, “Cutadapt removes adapter sequences from high-throughput sequencing  
812 reads,” *EMBnet. J.*, vol. 17, no. 1, p. pp--10, 2011.
- 813 [57] B. J. Callahan, P. J. McMurdie, M. J. Rosen, A. W. Han, A. J. A. Johnson, and S. P.  
814 Holmes, “DADA2: High-resolution sample inference from Illumina amplicon data,”  
815 *Nat. Methods*, vol. 13, no. 7, pp. 581–583, Jul. 2016.
- 816 [58] B. J. Callahan, P. J. McMurdie, and S. P. Holmes, “Exact sequence variants should  
817 replace operational taxonomic units in marker-gene data analysis,” *ISME J.*, vol. 11,  
818 no. 12, pp. 2639–2643, Dec. 2017.
- 819 [59] D. McDonald *et al.*, “The Biological Observation Matrix (BIOM) format or: how I  
820 learned to stop worrying and love the ome-ome,” *Gigascience*, vol. 1, no. 1, p. 7, 2012.
- 821 [60] N. A. Bokulich *et al.*, “Optimizing taxonomic classification of marker-gene amplicon  
822 sequences with QIIME 2’s q2-feature-classifier plugin,” *Microbiome*, vol. 6, no. 1, p.  
823 90, Dec. 2018.
- 824 [61] F. Pedregosa *et al.*, “Scikit-learn: Machine learning in Python,” *J. Mach. Learn. Res.*,  
825 vol. 12, no. Oct, pp. 2825–2830, 2011.
- 826 [62] M. N. Price, P. S. Dehal, and A. P. Arkin, “FastTree 2--approximately maximum-  
827 likelihood trees for large alignments,” *PLoS One*, vol. 5, no. 3, p. e9490, 2010.
- 828 [63] K. Katoh and D. M. Standley, “MAFFT multiple sequence alignment software version  
829 7: improvements in performance and usability,” *Mol. Biol. Evol.*, vol. 30, no. 4, pp.  
830 772–780, 2013.
- 831 [64] D. J. Lane, “16S/23S rRNA sequencing,” in *Nucleic Acid Techniques in Bacterial*  
832 *Systematics*, E. Stackebrandt and M. Goodfellow, Eds. New York: John Wiley and  
833 Sons, 1991, pp. 115–175.
- 834 [65] D. P. Faith, “Conservation evaluation and phylogenetic diversity,” *Biol. Conserv.*, vol.  
835 61, no. 1, pp. 1–10, 1992.
- 836 [66] S. Weiss *et al.*, “Normalization and microbial differential abundance strategies depend  
837 upon data characteristics,” *Microbiome*, vol. 5, no. 1, p. 27, Mar. 2017.
- 838 [67] W. H. Kruskal and W. A. Wallis, “Use of ranks in one-criterion variance analysis,” *J.*  
839 *Am. Stat. Assoc.*, vol. 47, no. 260, pp. 583–621, 1952.

- 840 [68] T. Sorenson, "A method of establishing groups of equal amplitude in plant sociology  
841 based on similarity of species content.," *K. Danske Vide- nskabernes Selsk.*, 1948.
- 842 [69] P. Legendre and L. Legendre, "Numerical Ecology," Third., Elsevier, 2012, p. 499.
- 843 [70] M. J. Anderson, "A new method for non-parametric multivariate analysis of variance,"  
844 *Austral Ecol.*, vol. 26, no. 1, pp. 32–46, 2001.
- 845 [71] P. J. McMurdie and S. Holmes, "phyloseq: An R Package for Reproducible Interactive  
846 Analysis and Graphics of Microbiome Census Data," *PLoS One*, vol. 8, no. 4, p.  
847 e61217, Apr. 2013.
- 848 [72] J. T. Morton *et al.*, "Establishing microbial composition measurement standards with  
849 reference frames," *Nat. Commun.*, vol. 10, no. 1, p. 2719, 2019.
- 850 [73] M. W. Fedarko *et al.*, "Visualizing 'omic feature rankings and log-ratios using Qurro,"  
851 *NAR Genomics Bioinforma.*, vol. 2, no. 2, 2020.
- 852 [74] S. Mandal, W. Van Treuren, R. A. White, M. Eggesbø, R. Knight, and S. D. Peddada,  
853 "Analysis of composition of microbiomes: a novel method for studying microbial  
854 composition," *Microb. Ecol. Heal. Dis.*, vol. 26, no. 0, May 2015.
- 855 [75] S. Mandal, W. Van Treuren, R. A. White, M. Eggesbø, R. Knight, and S. D. Peddada,  
856 "Analysis of composition of microbiomes: a novel method for studying microbial  
857 composition," *Microb. Ecol. Heal. Dis.*, vol. 26, no. 0, May 2015.
- 858 [76] H. Zhu, S.-J. Sun, and H.-Y. Dang, "PCR detection of *Serratia* spp. using primers  
859 targeting pfs and luxS genes involved in AI-2-dependent quorum sensing.," *Curr.*  
860 *Microbiol.*, vol. 57, no. 4, pp. 326–330, Oct. 2008.
- 861 [77] C. L. Jeffries *et al.*, "Novel *Wolbachia* strains in *Anopheles malaria* vectors from Sub-  
862 Saharan Africa [version 2; peer review: 3 approved]," *Wellcome Open Res.*, vol. 3, no.  
863 113, 2018.
- 864 [78] X. Ren and J. L. Rasgon, "Potential for the &lt;em>&lt;/em></p></div>

- 881 strain pyd-1,” *World J. Microbiol. Biotechnol.*, vol. 27, no. 10, pp. 2315–2324, Oct.  
882 2011.
- 883 [84] M. P. Talwar, S. I. Mulla, and H. Z. Ninnekar, “Biodegradation of organophosphate  
884 pesticide quinalphos by *Ochrobactrum* sp. strain HZM,” *J. Appl. Microbiol.*, vol. 117,  
885 no. 5, pp. 1283–1292, Nov. 2014.
- 886 [85] X. H. Qiu, W. Q. Bai, Q. Z. Zhong, M. Li, F. Q. He, and B. T. Li, “Isolation and  
887 characterization of a bacterial strain of the genus *Ochrobactrum* with methyl parathion  
888 mineralizing activity,” *J. Appl. Microbiol.*, vol. 101, no. 5, pp. 986–994, Nov. 2006.
- 889 [86] X. Hao *et al.*, “Screening and Genome Sequencing of Deltamethrin-Degrading  
890 Bacterium ZJ6,” *Curr. Microbiol.*, vol. 75, no. 11, pp. 1468–1476, Nov. 2018.
- 891 [87] G. P. Hu *et al.*, “Isolation, identification and cyfluthrin-degrading potential of a novel  
892 *Lysinibacillus sphaericus* strain, FLQ-11-1,” *Res. Microbiol.*, vol. 165, no. 2, pp. 110–  
893 118, 2014.
- 894 [88] M. Ozdal, O. G. Ozdal, and O. F. Algur, “Isolation and Characterization of  $\alpha$ -  
895 Endosulfan Degrading Bacteria from the Microflora of Cockroaches ,” *Polish J.*  
896 *Microbiol.*, vol. 65, no. 1, pp. 63–68, 2016.
- 897 [89] N. A. Broderick, K. F. Raffa, and J. Handelsman, “Midgut bacteria required for  
898 *Bacillus thuringiensis* insecticidal activity,” 2006.
- 899 [90] S. Fang *et al.*, “*Bacillus thuringiensis* Bel Protein Enhances the Toxicity of Cry1Ac  
900 Protein to *Helicoverpa armigera* Larvae by Degrading Insect Intestinal Mucin,” *Appl.*  
901 *Environ. Microbiol.*, vol. 75, no. 16, pp. 5237–5243, 2009.
- 902 [91] A. Capone *et al.*, “Interactions between *Asaia*, *Plasmodium* and *Anopheles*: New  
903 insights into mosquito symbiosis and implications in Malaria Symbiotic Control,”  
904 *Parasites and Vectors*, vol. 6, no. 1, p. 182, Jun. 2013.
- 905 [92] A. J. Castro, “Antimalarial activity of prodigiosin [11],” *Nature*, vol. 213, no. 5079.  
906 Nature Publishing Group, pp. 903–904, 01-Mar-1967.
- 907 [93] C. D. Patil, S. V. Patil, B. K. Salunke, and R. B. Salunkhe, “Prodigiosin produced by  
908 *Serratia marcescens* NMCC46 as a mosquito larvicidal agent against *Aedes aegypti*  
909 and *Anopheles stephensi*,” *Parasitol. Res.*, vol. 109, no. 4, pp. 1179–1187, Oct. 2011.
- 910 [94] R. N. C. Guedes, S. S. Walse, and J. E. Throne, “Sublethal exposure, insecticide  
911 resistance, and community stress,” *Current Opinion in Insect Science*, vol. 21. Elsevier  
912 Inc., pp. 47–53, 01-Jun-2017.
- 913 [95] S. Rajatileka, J. Burhani, and H. Ranson, “Mosquito age and susceptibility to  
914 insecticides,” *Trans. R. Soc. Trop. Med. Hyg.*, vol. 105, no. 5, pp. 247–253, May 2011.
- 915 [96] C. M. Jones, A. Sanou, W. M. Guelbeogo, N. Sagnon, P. C. D. Johnson, and H.  
916 Ranson, “Aging partially restores the efficacy of malaria vector control in insecticide-  
917 resistant populations of *Anopheles gambiae* s.l. from Burkina Faso,” *Malar. J.*, vol. 11,  
918 no. 1, pp. 1–11, Jan. 2012.
- 919 [97] M. Rowland and J. Hemingway, “Changes in malathion resistance with age in  
920 *Anopheles stephensi* from Pakistan,” *Pestic. Biochem. Physiol.*, vol. 28, no. 2, pp.  
921 239–247, Jun. 1987.

- 922 [98] J. D. LINES and N. S. NASSOR, “DDT resistance in *Anopheles gambiae* declines  
923 with mosquito age,” *Med. Vet. Entomol.*, vol. 5, no. 3, pp. 261–265, Jul. 1991.
- 924 [99] M. H. Hodjati and C. F. Curtis, “Evaluation of the effect of mosquito age and prior  
925 exposure to insecticide on pyrethroid tolerance in *Anopheles* mosquitoes (Diptera:  
926 Culicidae),” *Bull. Entomol. Res.*, vol. 89, no. 4, pp. 329–337, 1999.
- 927 [100] E. Collins *et al.*, “The relationship between insecticide resistance, mosquito age and  
928 malaria prevalence in *Anopheles gambiae* s.l. from Guinea,” *Sci. Rep.*, vol. 9, no. 1, p.  
929 8846, 2019.

930

### 931 **Figure and Table Legend**

932

933 **Figure 4. PCoA plot showing Bray Curtis distance of microbiota between resistant,**  
934 **susceptible and control F<sub>1</sub> 2-3 day old adult *An. coluzzii*.** Each point represents the  
935 bacterial composition of a pool of three mosquitoes of the same resistance phenotype. There  
936 was a distinct separation between resistant/control and susceptible mosquitoes, which was  
937 shown to be a significant difference using a pairwise PERMANOVA (999 permutations)  
938 (pseudo-F = 19.44, p=0.0015).

939

940 **Figure 5. Venn diagram showing number of bacterial taxa unique to or shared between**  
941 **pools of 2-3 day old resistant, susceptible or control mosquitoes.** Taxa were identified to  
942 genus level or lowest possible taxonomic rank. n=number of pools (each pool consists of  
943 three mosquitoes of the same age and phenotype).

944

945 **Figure 6. Raw frequency of ASVs from the microbiota of control (n=14), resistant (n=16)**  
946 **and susceptible (n=28) F<sub>1</sub> 2-3 day old adult *An. coluzzii*.** Each column represents a pool of  
947 three mosquitoes of the same phenotype. ASVs were annotated to genus level or lowest  
948 possible taxonomic level (in square brackets). Only taxonomically annotated ASVs with a  
949 frequency of >150 are shown. Light blue indicates a low frequency of ASVs present, whilst  
950 darker blue indicates a higher frequency. Grey indicates ASV not present in that pool.

951

952 **Figure 4. Log ratios of 10% highest ranked features to 10% lowest ranked features in**  
953 **control, resistant and susceptible 2-3 day old F<sub>1</sub> *An. coluzzii*.** Susceptible mosquitoes had a  
954 significantly lower ratio than control or resistant mosquitoes indicating that the lowest ranked  
955 features were overabundant in the susceptible group, whilst the highest ranked features were  
956 overabundant in either resistant or control mosquitoes.

957

958 **Figure 5. Sorted differential ranks of features associated with resistant or susceptible**  
959 **phenotype in 2-3 day old *An. coluzzii*.** The highest 10% and lowest 10% of ranked features  
960 are shown, coloured by their corresponding assigned taxon. Taxa are shown to genus or  
961 lowest possible taxonomic level (square brackets).



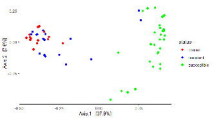

Control (n=14)

Resistant (n=16)

20

13

15

60

4

2

0

Susceptible (n=28)

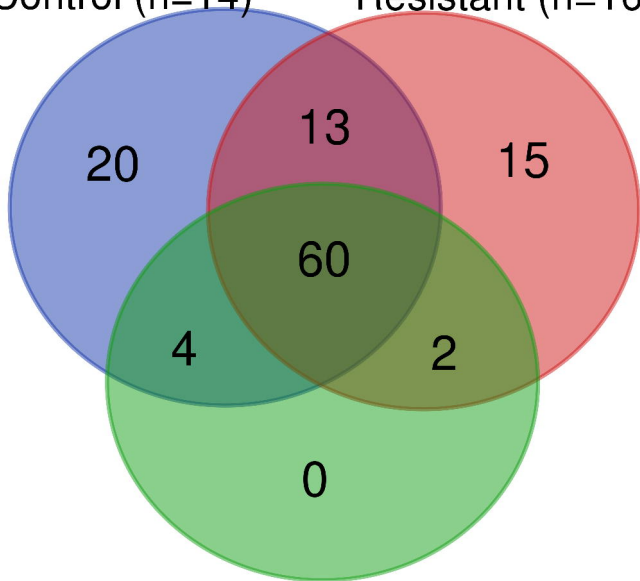

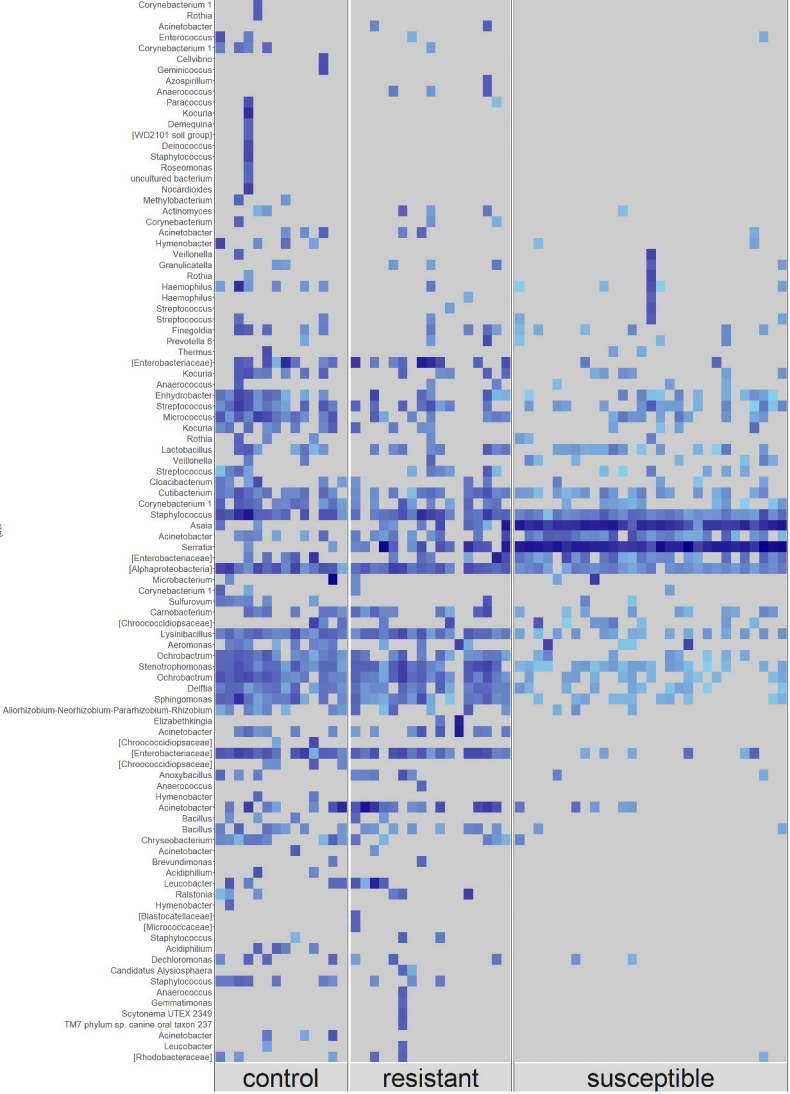

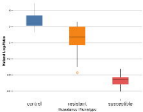

# Flaxlinen

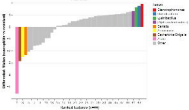

Source: https://biorxiv.org/content/10.1101/2021.03.26.437219v1.full.pdf
